# Supplementary material for: Co-Entrapment of Sorafenib and Cisplatin Drugs and iRGD Tumour Homing Peptide by Poly[ε-caprolactone-co-(12-hydroxystearate)] Copolymer
Source: MDPI journal article supplement (doi:10.3390/biomedicines10010043), 2021-12-26
Supplement: s1 [file s1]

# Co-entrapment of sorafenib and cisplatin drugs and iRGD tumour homing peptide by poly[ $\epsilon$ -caprolactone-co-(12-hydroxystearate)] copolymer

Izolda Kántor<sup>1,2</sup>, Diana Dreavă<sup>3</sup>, Anamaria Todea<sup>3</sup>, Francisc Péter<sup>3,4\*</sup>, Zoltán May<sup>1</sup>, Emese Biró<sup>3</sup>, György Babos<sup>2</sup>, Tivadar Feczko<sup>1,2\*</sup>

<sup>1</sup>Institute of Materials and Environmental Chemistry, Research Centre for Natural Sciences, Magyar tudósok körútja 2, H-1117, Budapest, Hungary.

<sup>2</sup>Research Institute of Biomolecular and Chemical Engineering, University of Pannonia, Egyetem u. 10, H-8200, Veszprém, Hungary.

<sup>3</sup>University Politehnica of Timișoara, Faculty of Industrial Chemistry and Environmental Engineering, Carol Telbisz 6, RO-300001, Timișoara, Romania.

<sup>4</sup>Research Institute for Renewable Energies, University Politehnica Timișoara, G. Muzicescu 138, Timișoara, RO-300501, Romania;

\* Correspondence: anamaria.todea@upt.ro, feczko@mukki.richem.hu

## Supplementary material

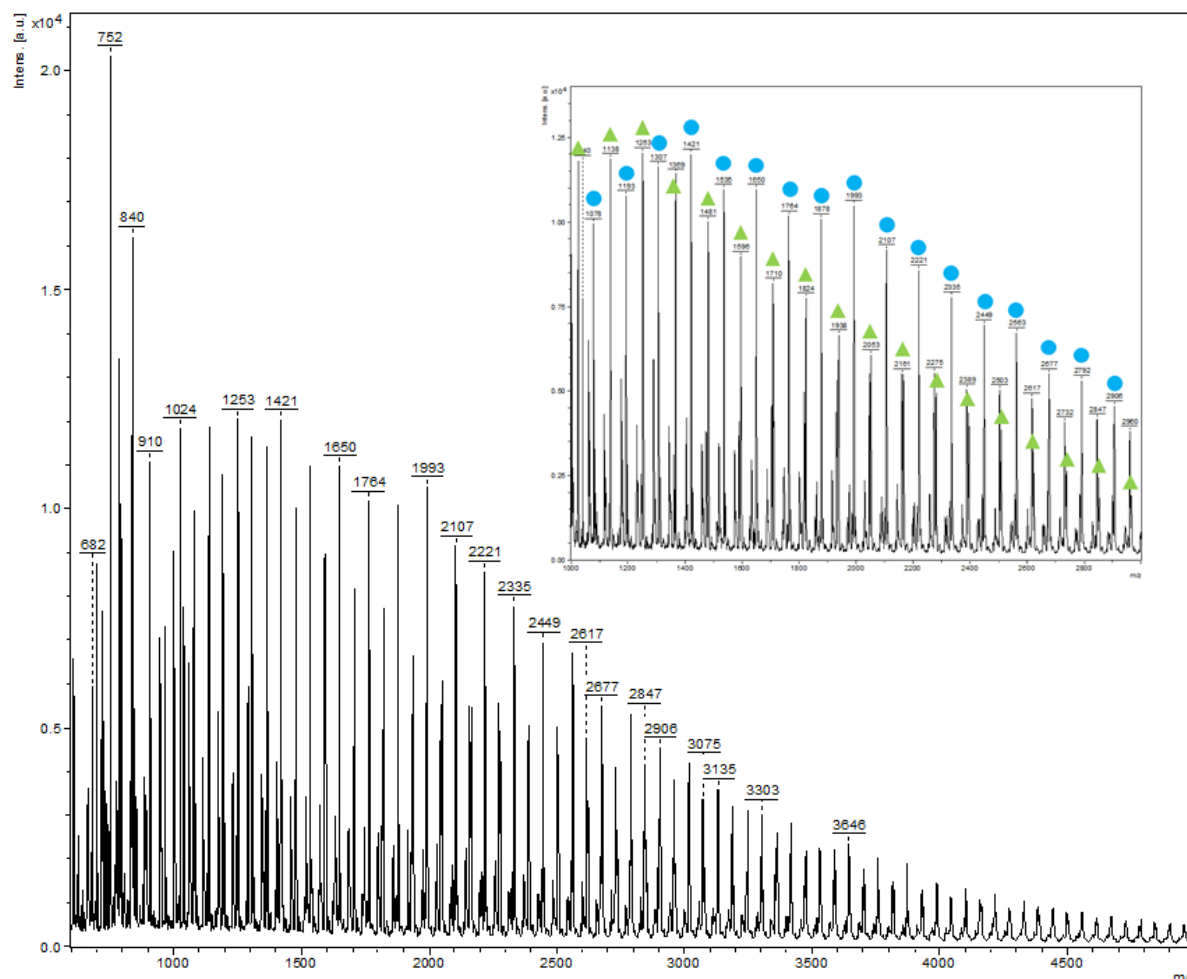

**Figure S1.** MALDI-TOF MS spectrum of the 12CL copolymer used for nanoencapsulation of sorafenib and cisplatin. In the excerpt, the 1000-3000 m/z domain, indicating the linear copolymers with one (triangles) and two (circles) 12-hydroxystearic unit in the backbone.
